# Supplementary material for: Potential mediated electrochemical recycling and sensing of cadmium ions in wastewater over ZnO/SA-g-PPy biocomposite
Source: Royal Society of Chemistry journal article supplement (doi:10.1039/d3ma00246b), 2023-01-01
Supplement: d3ma00246b1.pdf [file d3ma00246b1.pdf]

*Supplementary Information*

**Potential mediated electrochemical recycling and sensing of cadmium ions in wastes water over ZnO/SA-g-PPy bio-composite**

Sandeep Verma <sup>a&b</sup>, Ashok K. Sharma<sup>a\*</sup> and Saroj K. Shukla<sup>b\*</sup>

<sup>a</sup>Thin-Film Lab, Department of Chemistry, Deenbandhu Chhotu Ram University of Science and Technology, Murthal-131039, India

<sup>b</sup>Department of Polymer Science, Bhaskaracharya College of Applied Sciences, University of Delhi, Delhi 110075, India

\*Corresponding authors

E-mail addresses: [draksharma.chem@dcrustm.org](mailto:draksharma.chem@dcrustm.org) (Ashok K. Sharma),  
[sarojshukla2003@yahoo.co.in](mailto:sarojshukla2003@yahoo.co.in) (Saroj K. Shukla)

**Table S1.** Observed physical parameters during polymerizations.

| Composition  | Time for the beginning of polymerization (min.) | Completion time for polymerization (min.) | Temperature change of reaction bath (°C) | pH | Yield of reaction (%) |
|--------------|-------------------------------------------------|-------------------------------------------|------------------------------------------|----|-----------------------|
| PPy          | 3.5                                             | 20.0                                      | 0.5                                      | 2  | 67                    |
| ZnO/SA-g-PPy | 2.0                                             | 15.0                                      | 2.0                                      | 2  | 78                    |

**Table S2.** IR peaks for PPy, Sodium Alginate (SA), SA-g-PPy, and ZnO/SA-g-PPy.

| Sr. No. | SA (cm <sup>-1</sup> ) | PPy (cm <sup>-1</sup> ) | SA-g-PPy (cm <sup>-1</sup> ) | ZnO/SA-g-PPy (cm <sup>-1</sup> ) | Assigned group                                                                                                               |
|---------|------------------------|-------------------------|------------------------------|----------------------------------|------------------------------------------------------------------------------------------------------------------------------|
| 1.      | --                     | --                      | 793                          | 793                              | C-H and N-H ring out-of-plane bending                                                                                        |
| 2.      | 927                    | 906                     | 916                          | 916                              | C-O-H and C-N-H stretching in SA and PPy ring in-plane bending                                                               |
| 3.      | 1046                   | 1043                    | 1045                         | --                               | C-O-C glycosidic linkage of SA<br>And C-N-C linkage in PPy                                                                   |
| 4.      | 1186                   | 1187                    | 1188                         | 1182                             | C-C stretching                                                                                                               |
| 5.      | --                     | 1221                    | --                           | --                               | C-H and N-H in-plane deformation vibrations                                                                                  |
| 6.      | --                     | 1361                    | --                           | --                               | C-N stretching in polypyrrole ring                                                                                           |
| 7.      | 1413                   | --                      | 1410                         | 1401--                           | O-H and N-H bend vibration                                                                                                   |
| 8.      | 1556                   | 1552                    | 1546                         | 1557                             | Strong hydrogen bonds between the pyrrole N-H groups and the hydroxyl groups and free COO <sup>-</sup> group of adjacent SA. |
| 9.      | 1637                   | 1706, 1723              | 1712                         | 1712 weak                        | Interaction of Zn <sup>2+</sup> with polypyrrole and COO <sup>-</sup>                                                        |
| 10.     | 2950                   | 3004                    | 2804, 2881                   | 2835                             | C-H sp <sup>3</sup>                                                                                                          |

|     |      |      |      |      |             |
|-----|------|------|------|------|-------------|
| 11. | 3430 | 3406 | 3298 | 3644 | N-H and O-H |
|-----|------|------|------|------|-------------|

**Table S3.** XRD data and structural parameters

| S. No. | Sample       | Angle ( $2\theta$ ) | Plane (hkl) | <i>d</i> -value (Å) |
|--------|--------------|---------------------|-------------|---------------------|
| 1.     | SA-g-PPy     | 25.10°              | 110         | 3.55                |
| 2.     | ZnO          | 31.78°              | 100         | 2.41                |
|        |              | 34.44°              | 002         | 2.09                |
|        |              | 36.22°              | 101         | 1.47                |
|        |              | 47.55°              | 102         | 1.90                |
|        |              | 56.64°              | 110         | 1.60                |
|        |              | 62.91°              | 103         | 1.46                |
|        |              | 66.35°              | 200         | 1.40                |
|        |              | 67.97°              | 112         | 1.37                |
|        |              | 69.18°              | 201         | 1.35                |
| 3.     | ZnO/SA-g-PPy | 17.88°              | 110         | 4.96                |
|        |              | 23.65°              | 110         | 3.85                |
|        |              | 26.29°              | 110         | 3.39                |
|        |              | 30.57°              | 100         | 2.96                |
|        |              | 32.92°              | 100         | 2.25                |
|        |              | 36.28°              | 101         | 1.46                |

**Table S4.** IR peaks and corresponding intensity of ZnO/SA-g-PPy electrode-based sensor, after sensing and before sensing of Cd<sup>2+</sup> ions.

| Before Sensing                    |           | After Sensing                     |           |
|-----------------------------------|-----------|-----------------------------------|-----------|
| Peak Position (cm <sup>-1</sup> ) | Intensity | Peak Position (cm <sup>-1</sup> ) | Intensity |
| 617                               | 37.89     | 617                               | 136.89    |
| 1041                              | 42.18     | 1116                              | 92.84     |
| 1413                              | 24.44     | 1398                              | 165.38    |
| 1557                              | 16.86     | 1384                              | 151.24    |
| 1648                              | 39.78     | 1619                              | 150.58    |
|                                   |           | 1713                              | 153.87    |
